# Supplementary material for: Ectopic expression of DOCK8 regulates lysosome-mediated pancreatic tumor cell invasion
Source: PubMed Central journal article supplement — Cell Rep. Author manuscript; Available in PMC 2023 Oct 23. (PMC10591794; doi:10.1016/j.celrep.2023.113042), 2023-08-30
Supplement: NIHMS1933888-supplement-1.pdf [file NIHMS1933888-supplement-1.pdf]

**Cell Reports, Volume 42**

**Supplemental information**

**Ectopic expression of DOCK8 regulates  
lysosome-mediated pancreatic tumor cell invasion**

**Omar L. Gutierrez-Ruiz, Katherine M. Johnson, Eugene W. Krueger, Roseanne E. Nooren, Nicole Cruz-Reyes, Carrie Jo Heppelmann, Tara L. Hogenson, Martin E. Fernandez-Zapico, Mark A. McNiven, and Gina L. Razidlo**



## Supplementary Information

### Figure S1. Generation of TMEM192-HA stable cells for lysosome proteomic analysis and validation of KRAS-mediated DOCK8 expression and localization to lysosomes.

#### Related to Figure 1.

**A**, Immunoblotting for HA following lentiviral transduction of TMEM192-HA construct into iKRAS<sup>G12D</sup> cells. GAPDH serves as loading control. **B**, Immunofluorescence staining of LAMP1 (green) and HA (TMEM192-HA, red) in TMEM192-HA iKRAS<sup>G12D</sup> cells. Nuclei were labeled with Hoechst (blue). Scale bar, 10 $\mu$ m. **C**, Immunoblotting of whole cell lysates (WCL) and lysosomes isolated from control or TMEM192-HA iKRAS<sup>G12D</sup> cells cultured with doxycycline (KRAS<sup>G12D</sup>, 1 $\mu$ g/ml) or following 72-hour doxycycline withdrawal (WT). Purity and integrity of isolated lysosomes was validated by immunoblotting for lysosome markers (TMEM192-HA, LAMP2A, cathepsin B), lysosome binding proteins (mTOR, Rab7), and non-lysosome markers (GM130, Golgi; COXIV, Mitochondria). Induction of KRAS<sup>G12D</sup> expression was validated by immunoblotting of phosphorylated ERK (pERK) and total ERK. **D**, Immunoblotting of DOCK8 in whole cell lysates (WCL) and lysosomes isolated from control or TMEM192-HA Panc04.03 cells. Purity and integrity of isolated lysosomes was validated by immunoblotting for lysosome markers (LAMP1, cathepsin B), and non-lysosome marker (COXIV, Mitochondria). Images of DOCK8-YFP (green) localizing to lysotracker labeled lysosomes (red) in **E**, iKRAS<sup>G12D</sup> and **F**, Panc04.03 cells. Scale bar, 5 $\mu$ m (E) or 10 $\mu$ m (F). **G**, Immunoblotting and **H**, Quantitation of KRAS protein levels in iKRAS<sup>G12D</sup> cells cultured with or without doxycycline as indicated above. Induction of KRAS<sup>G12D</sup> expression was validated by immunoblotting of pERK and total ERK, and GAPDH served as loading control. **I**, Immunoblotting and **J**, Quantitation of iKRAS<sup>G12D</sup> cells transfected with HA control or WT-KRAS-HA or treated with and without doxycycline as described above. **K**, DOCK8 is not degraded by lysosomes. Immunoblotting of DOCK8 in TMEM192-HA iKRAS<sup>G12D</sup> expressing WT or KRAS<sup>G12D</sup> following treatment with BafilomycinA1 (Baf, 1 $\mu$ M) for 0, 12, and 24 hours. p62 is a positive control for a cargo degraded by lysosomes, and GAPDH serves as a loading control. Graphs show the mean  $\pm$  S.E.M of at least three independent biological replicates. P-values were calculated using a Students t-test. ns,  $p > .05$ ; \*,  $p \leq 0.05$ ; \*\*,  $p < 0.01$ ; \*\*\*,  $p < 0.001$ ; \*\*\*\*,  $p \leq 0.0001$ .



A

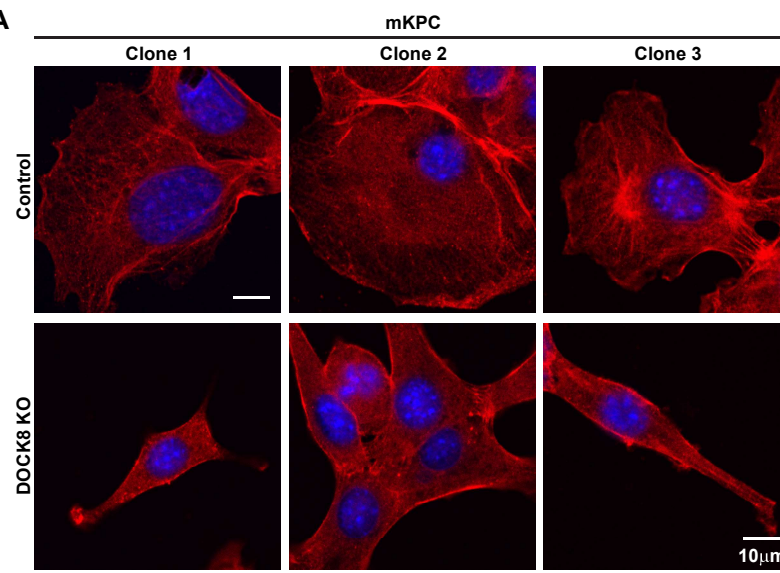

B

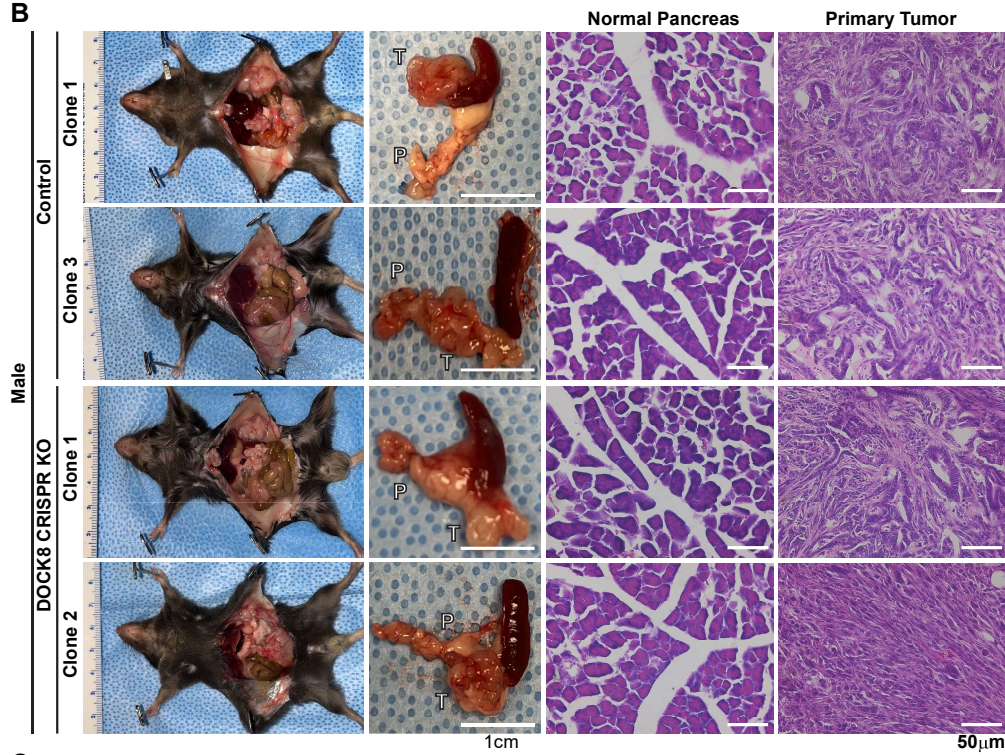

D

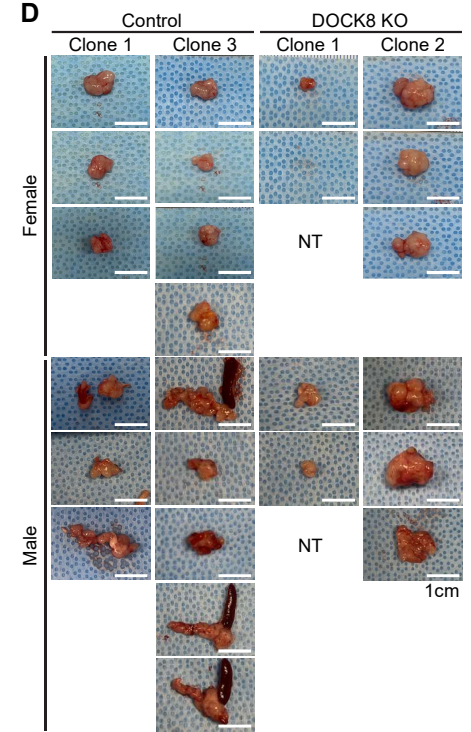

C

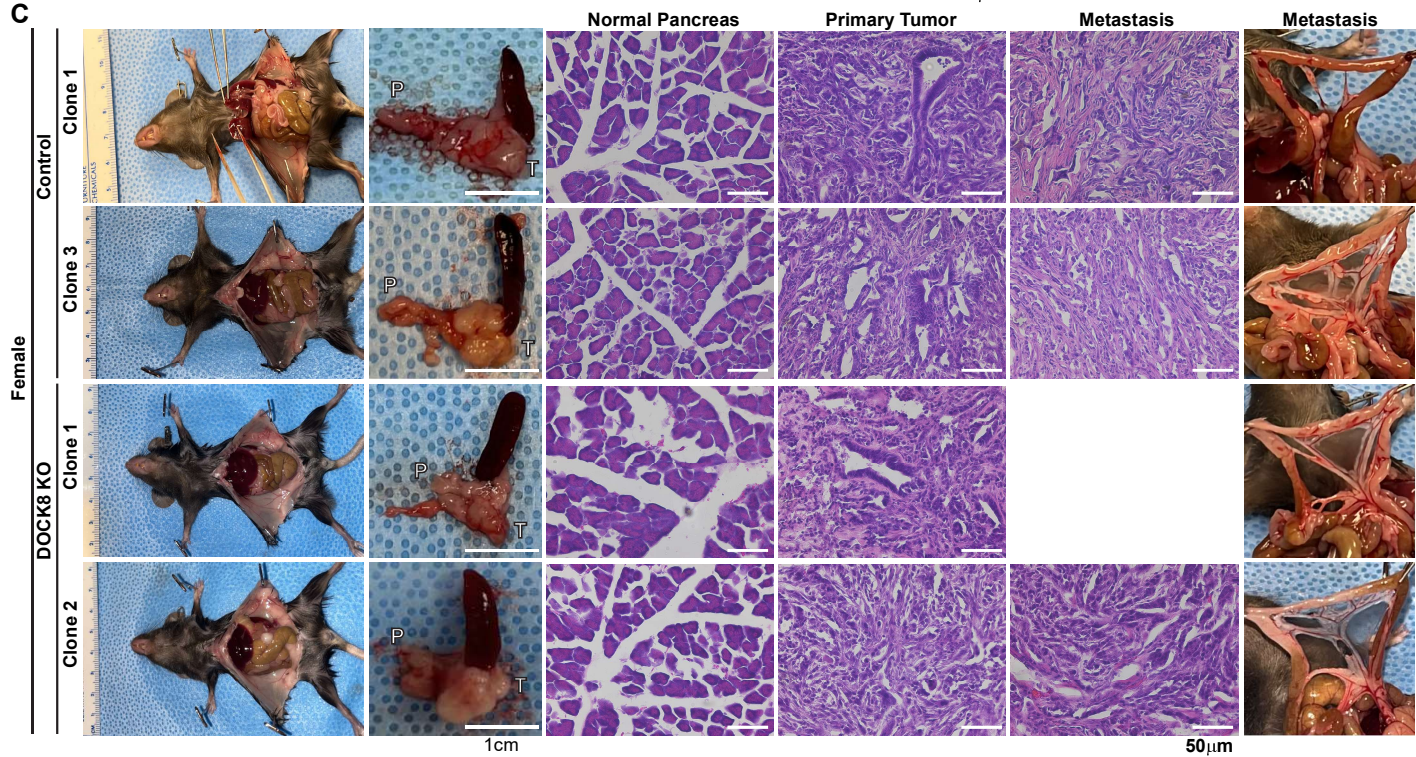



**Figure S2. DOCK8 CRISPR knockout impairs tumor progression and metastatic invasion *in vivo***

**Related to Figure 2**

**A**, Immunofluorescence staining of Actin (red) in mKPC control or DOCK8 CRISPR knockout clones 1-3. Nuclei were labeled with Hoechst (blue). Scale bar, 10 $\mu$ m. **B**, **C**, Representative images of C57Bl/6J mice following pancreatic orthotopic injection of control (clone 1 or 3) or DOCK8 knockout (clone 1 or 2) in **B**, male and **C**, female. Image panel includes a general picture of each mouse, resected pancreas (P) with primary tumor (T) attached to the spleen (scale bar 1cm), H&E staining of normal pancreas, primary and metastatic tumors (scale bar 50 $\mu$ m). **D**, Control or DOCK8 knockout primary tumors from male and female mice. Scale bar, 1cm.

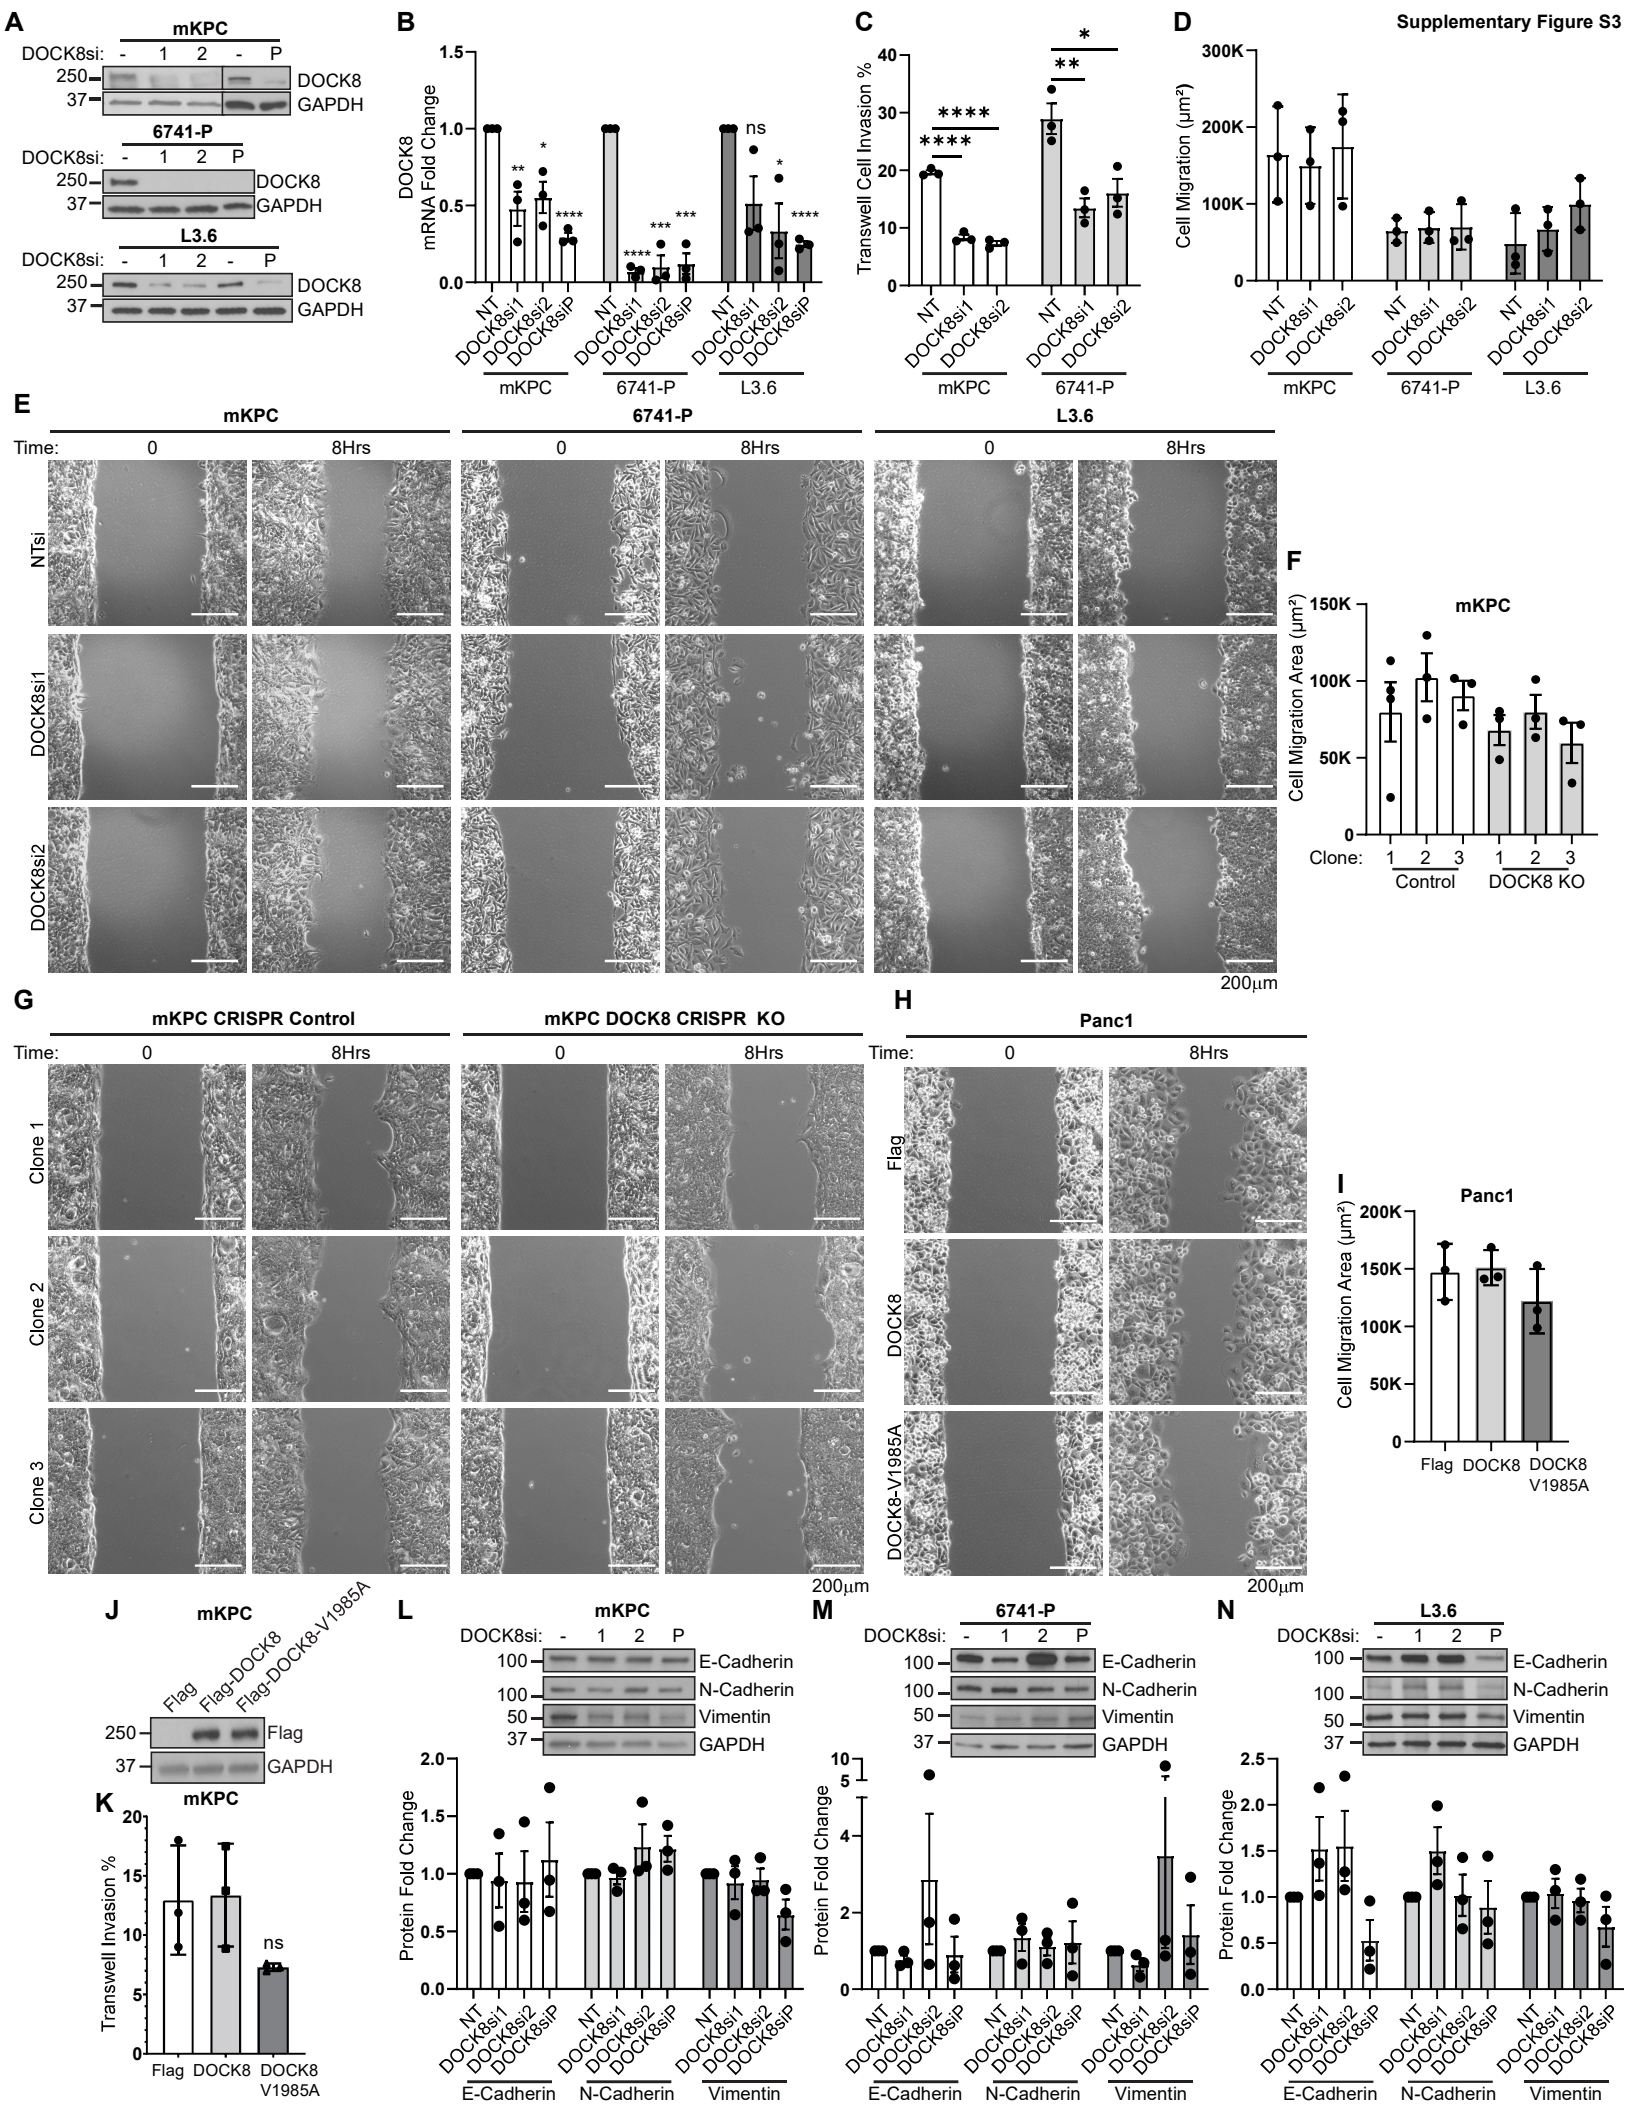

**Figure S3. DOCK8 is required for cell invasion but dispensable for cell migration.**

**Related to Figure 2**

**A**, Immunoblotting and **B**, Relative DOCK8 mRNA levels by qRT-PCR confirming DOCK8 knockdown by individual DOCK8si1 and DOCK8si2 and DOCK8siP in mKPC, 6741-P, and L3.6 cells. **C**, Quantitation of % transwell invasion following DOCK8 knockdown by the indicated siRNAs in mKPC, 6741-P, and L3.6 cells. A total of at least 500 cells were counted per condition on the top and bottom of the transwell filter followed by calculation of % of invasion. **D**, Quantitation and **E**, Images of wound healing cell migration at 0 and 8 hours in nontargeting (NT) control and DOCK8 knockdown (DOCK8si1 and 2) mKPC, 6741-P, and L3.6 cells. **F**, Quantitation and **G**, Images of wound healing cell migration at 0 and 8 hours in control and DOCK8 CRISPR knockout mKPC cells clones 1-3. **H**, Images and **I**, Quantitation of wound healing cell migration at 0 and 8 hours in Panc1 cells stably expressing Flag, Flag-DOCK8, or Flag-DOCK8-V1985A (GEF inactive). Cell migration area is graphed ( $\mu\text{m}^2$ ). Scale bar, 200 $\mu\text{m}$ . **J**, Immunoblotting of DOCK8 in mKPC cells following lentiviral transduction of Flag, Flag-DOCK8, or Flag-DOCK8-V1985 (GEF inactive). **K**, Quantitation of transwell cell invasion assay of mKPC cells described in **J**. Cells were seeded on matrigel coated transwell filters and allowed to invade for 20 hours towards a high serum gradient. A total of 1500 cells were quantitated per condition across 3 experiments. **L-N**, Immunoblotting and quantitation of EMT markers E-Cadherin, N-Cadherin, and Vimentin in DOCK8 knockdown (DOCK8si1, 2, or DOCK8siP) mKPC, 6741-P, and L3.6 cells. GAPDH serves as loading control. Validation of DOCK8 knockdown in these cells is shown in figure S7H. Graphs show the mean  $\pm$  S.E.M of at least three independent biological replicates. P-values were calculated using a Student's t-test. One-way ANOVA with the Tukey's post hoc test was used for comparison of the means of more than 2 datasets (**F**). ns,  $p > .05$ ; \*,  $p \leq 0.05$ ; \*\*,  $p < 0.01$ ; \*\*\*,  $p < 0.001$ ; \*\*\*\*,  $p \leq 0.0001$ .



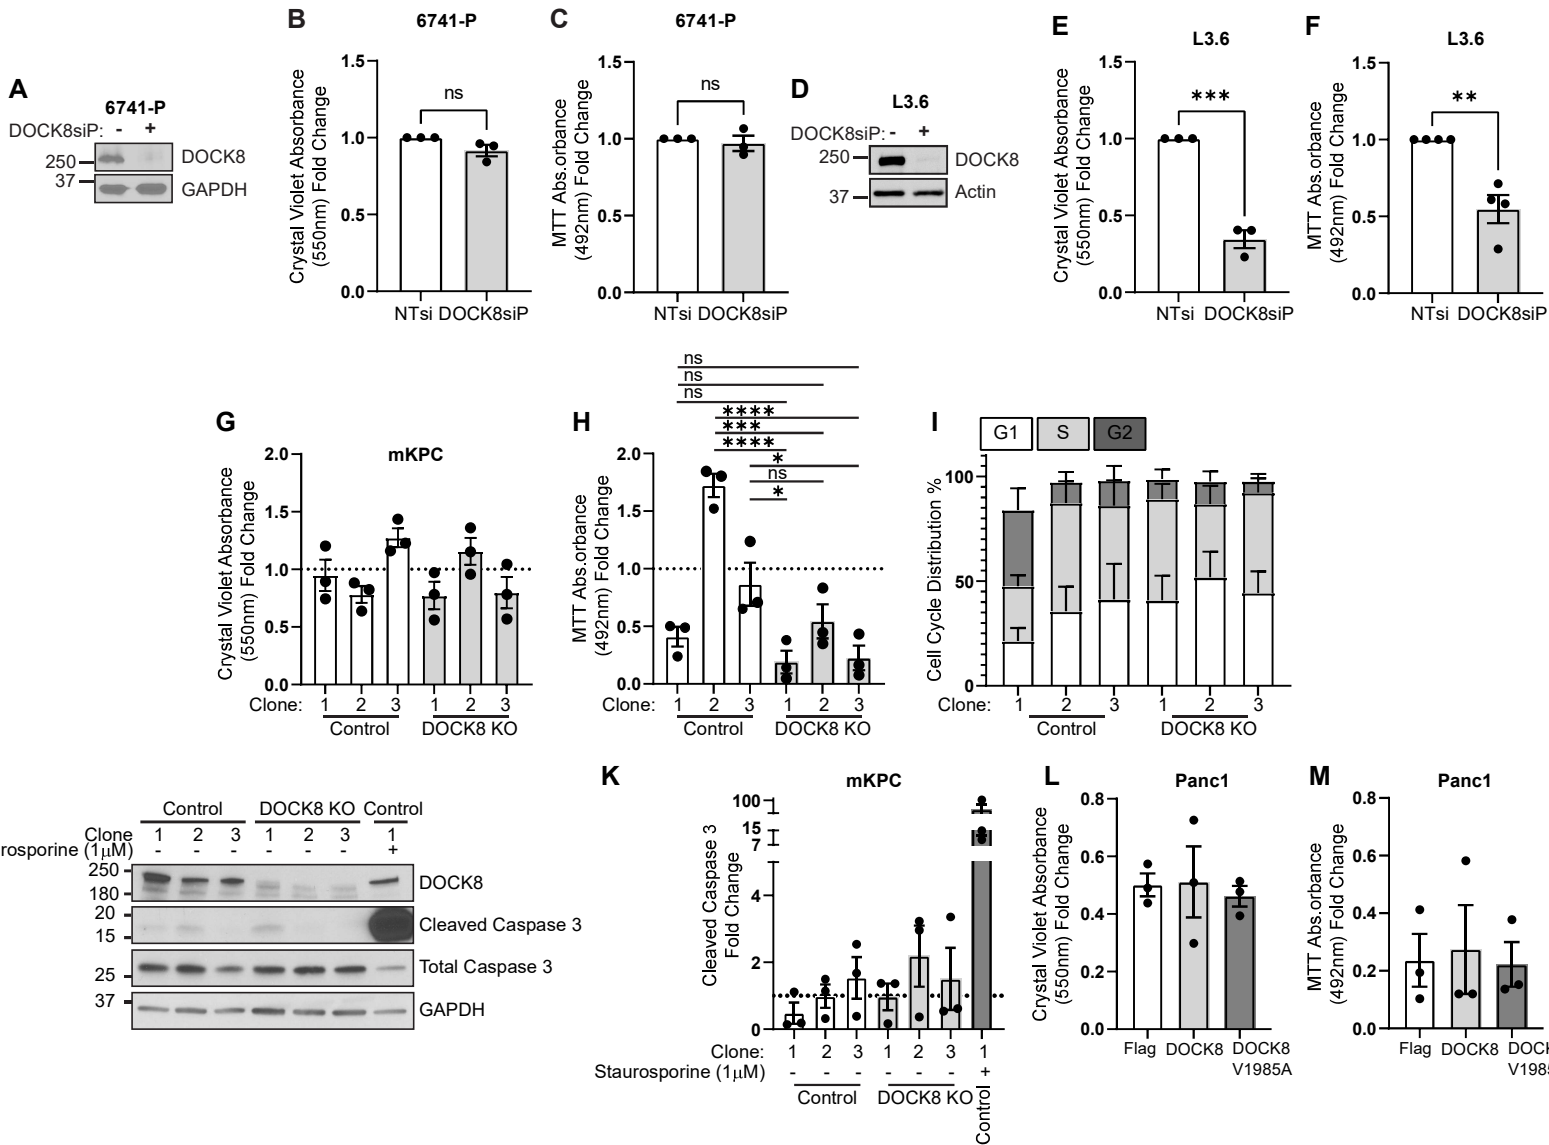

## **Figure S4. Minimal effects on cell viability upon DOCK8 depletion**

### **Related to Figure 2**

**A**, DOCK8 immunoblotting in 6741-P DOCK8 knockdown cells **B**, Quantification of crystal violet staining of 6741-P cells following DOCK8 knockdown. **C**, MTS cell viability assay of 6741-P cells following DOCK8 knockdown. **D**, DOCK8 immunoblotting in L3.6 DOCK8 knockdown cells **E**, Quantification of crystal violet staining of L3.6 cells following DOCK8 knockdown. **F**, MTS cell viability assay of L3.6 cells following DOCK8 knockdown. **G**, Crystal violet staining and **H**, MTS cell viability assay of control and DOCK8 CRISPR knockout mKPC cells (clones 1-3). **I**, Propidium iodide FACS assessment of cell cycle distribution of control and DOCK8 CRISPR knockout mKPC cells. **J**, Immunoblotting for the apoptosis marker cleaved and total caspase 3 in control and DOCK8 CRISPR knockout mKPC cells (clones 1-3). Treatment of control clone 1 with staurosporine (1 $\mu$ M) for 16 hours served as an apoptosis positive control. GAPDH serves as loading control. **K**, Quantitation of Cleaved caspase-3 fold change normalized to GAPDH. Individual fold changes were normalized to the average of control clones 1-3 (dotted line). **L**, Crystal violet staining and **M**, MTS cell viability assay of Flag, Flag-DOCK8, or Flag-DOCK8-V1985 Panc1 stable cells. Graphs show the mean  $\pm$  S.E.M of three independent biological replicates. P-values were calculated using a Student's t-test. One-way ANOVA with the Tukey's post hoc test was used for comparison of the means of more than 2 datasets (**G, H K**). ns,  $p > .05$ ; \*,  $p \leq 0.05$ ; \*\*,  $p < 0.01$ ; \*\*\*,  $p < 0.001$ ; \*\*\*\*,  $p \leq 0.0001$ .

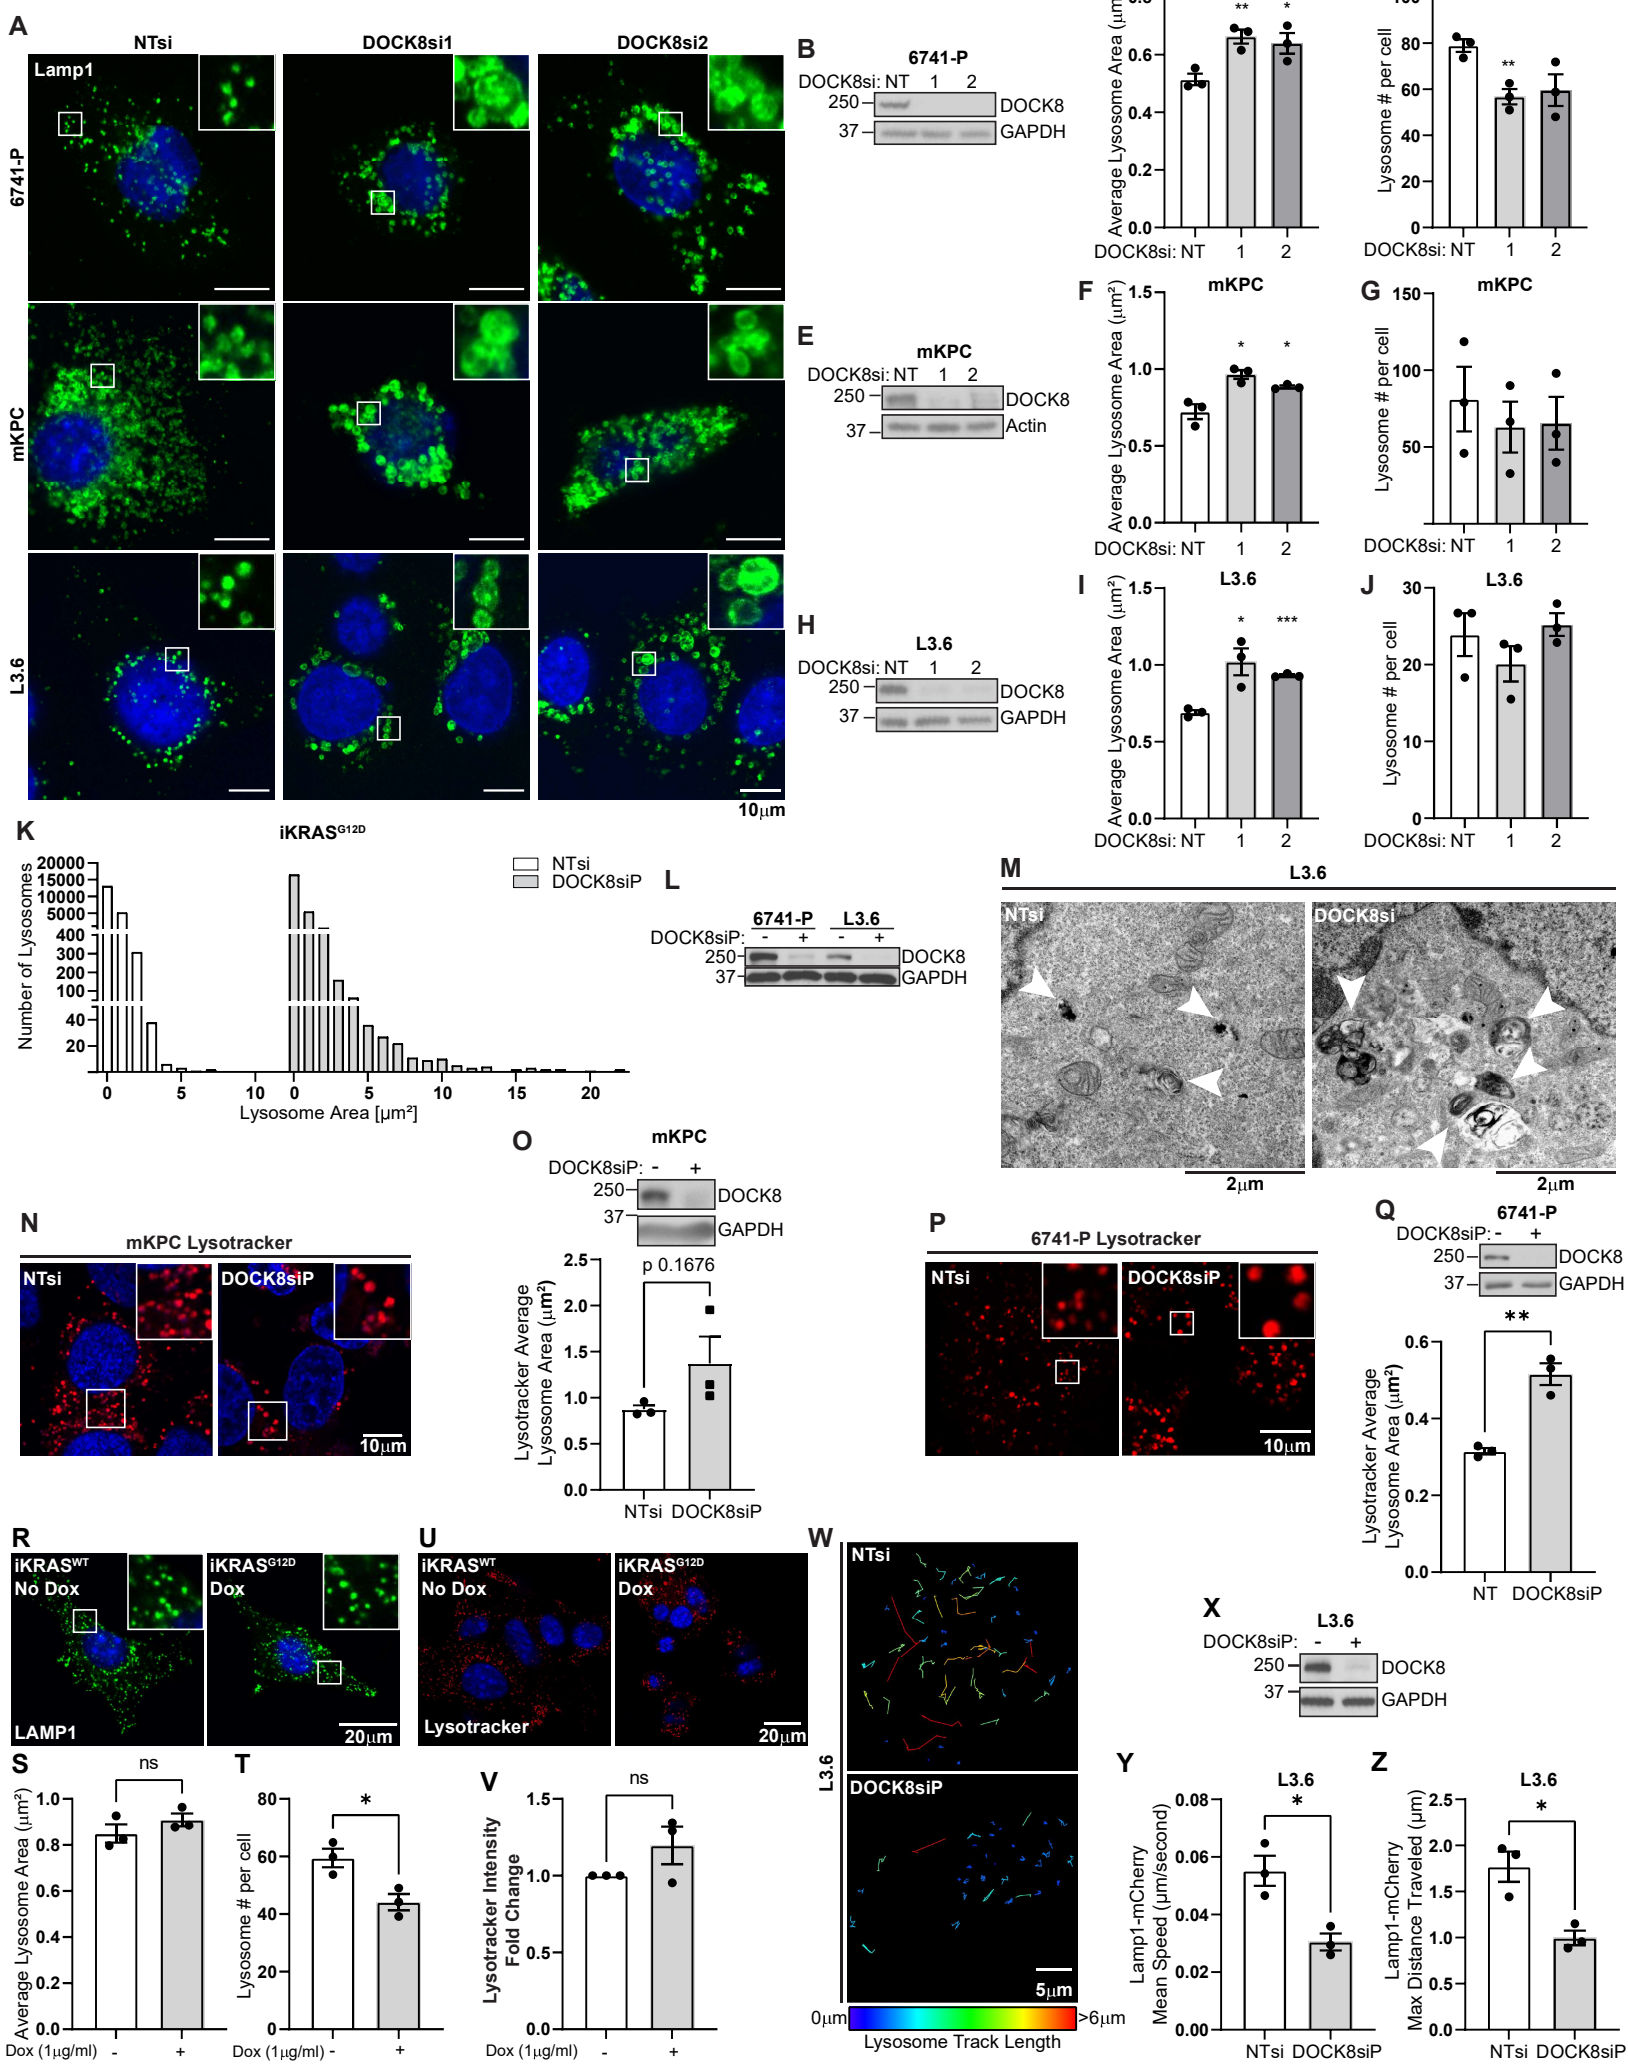



## Figure S5. DOCK8 regulates lysosome size and motility in pancreatic cancer cells

### Related to Figure 3

DOCK8 knockdown leads to enlarged lysosomes **A**, Immunofluorescence staining of Lamp1 (green) in nontargeting control and DOCK8 knockdown cells (DOCK8si1 and DOCK8si2) in 6741-P, mKPC, and L3.6 cells. Scale bar 10 $\mu$ m. DOCK8 immunoblotting in **B**, 6741-P, **E**, mKPC, and **H**, L3.6 DOCK8 knockdown cells. Quantitation of average lysosome area ( $\mu$ m<sup>2</sup>) in **C**, 6741-P, **F**, mKPC, and **I**, L3.6 DOCK8 knockdown cells. Quantitation of average lysosomes per cells in **D**, 6741-P (NT control n=99 cells, DOCK8si1 n=101 cells, DOCK8si2 n=97 cells), **G**, mKPC (NT control n=149 cells, DOCK8si1 n=114 cells, DOCK8si2 n=155 cells), and **J**, L3.6 DOCK8 knockdown cells (NT control n=178 cells, DOCK8si1 n=100 cells, DOCK8si2 n=105 cells). Graphs show the mean  $\pm$  S.E.M of at least three independent biological replicates. P-values were calculated using a Student's t-test. ns, p > .05; \*, p  $\leq$  0.05; \*\*, p < 0.01; \*\*\*, p < 0.001; \*\*\*\*, p  $\leq$  0.0001. **K**, Histogram showing frequency distribution of lysosome area ( $\mu$ m<sup>2</sup>) in DOCK8 knockdown versus nontargeting (NT) control iKRAS<sup>G12D</sup> cells, demonstrating an increase in the percentage of very large lysosomes following DOCK8 knockdown (iKRAS<sup>G12D</sup> NT control n=168 cells, DOCK8 knockdown n=137 cells). **L**, Immunoblotting of 6741-P and L3.6 cells following DOCK8 knockdown. **M**, Transmission electron microscopy of L3.6 cells following DOCK8 knockdown. White arrows indicate lysosome compartments, which are enlarged in the DOCK8 knockdown cells. Scale bar 2 $\mu$ m. **N**, Images of lysotracker labeled lysosomes (red) in mKPC cells following DOCK8 knockdown. Scale bar 10 $\mu$ m. **O**, Immunoblotting of mKPC cells following DOCK8 knockdown. GAPDH serves as loading control, and area quantitation of average lysotracker-labeled lysosomes ( $\mu$ m<sup>2</sup>). **P**, Images of lysotracker labeled lysosomes (red) in 6741-P cells following DOCK8 knockdown. Scale bar 10 $\mu$ m. **Q**, Immunoblotting of 6741-P cells following DOCK8 knockdown. GAPDH serves as loading control, and area quantitation of lysotracker-labeled lysosomes ( $\mu$ m<sup>2</sup>). **R**, Immunofluorescence staining of LAMP1 in iKRAS<sup>G12D</sup> cells cultured with doxycycline (KRAS<sup>G12D</sup>) (1 $\mu$ g/ml) or following 72-hour doxycycline withdrawal (WT). Scale bar 20 $\mu$ m. Quantitation of **S**, Average lysosome area ( $\mu$ m<sup>2</sup>), and **T**, Average lysosomes per cell (from **R**). **U**, Lysotracker labeling of iKRAS<sup>G12D</sup> cells cultured with doxycycline (KRAS<sup>G12D</sup>) (1 $\mu$ g/ml) or following 72-hour doxycycline withdrawal (WT). Scale bar 20 $\mu$ m. **V**, Quantitation of lysotracker mean fluorescence intensity fold change. Lysosome motility is reduced following DOCK8 knockdown. **W**, Track displacement of lysosomes over five minutes in LAMP1-mCherry labeled L3.6 cells. Tracks are pseudocolored to represent track length, 1 cell is shown. N=3 cells per condition in each of three independent experiments. Scale bar 5 $\mu$ m **X**, DOCK8 immunoblotting confirming DOCK8 knockdown in L3.6 cells. GAPDH serves as a loading control. **Y**, Quantitation of lysosome mean speed (of cells in **W**). **Z**, Quantitation of maximum lysosome distance traveled (of cells in **W**). Graphs show the mean  $\pm$  S.E.M of three independent biological replicates. P-values were calculated using a Student's t-test. ns, p > .05; \*, p  $\leq$  0.05; \*\*, p < 0.01; \*\*\*, p < 0.001; \*\*\*\*, p  $\leq$  0.0001.

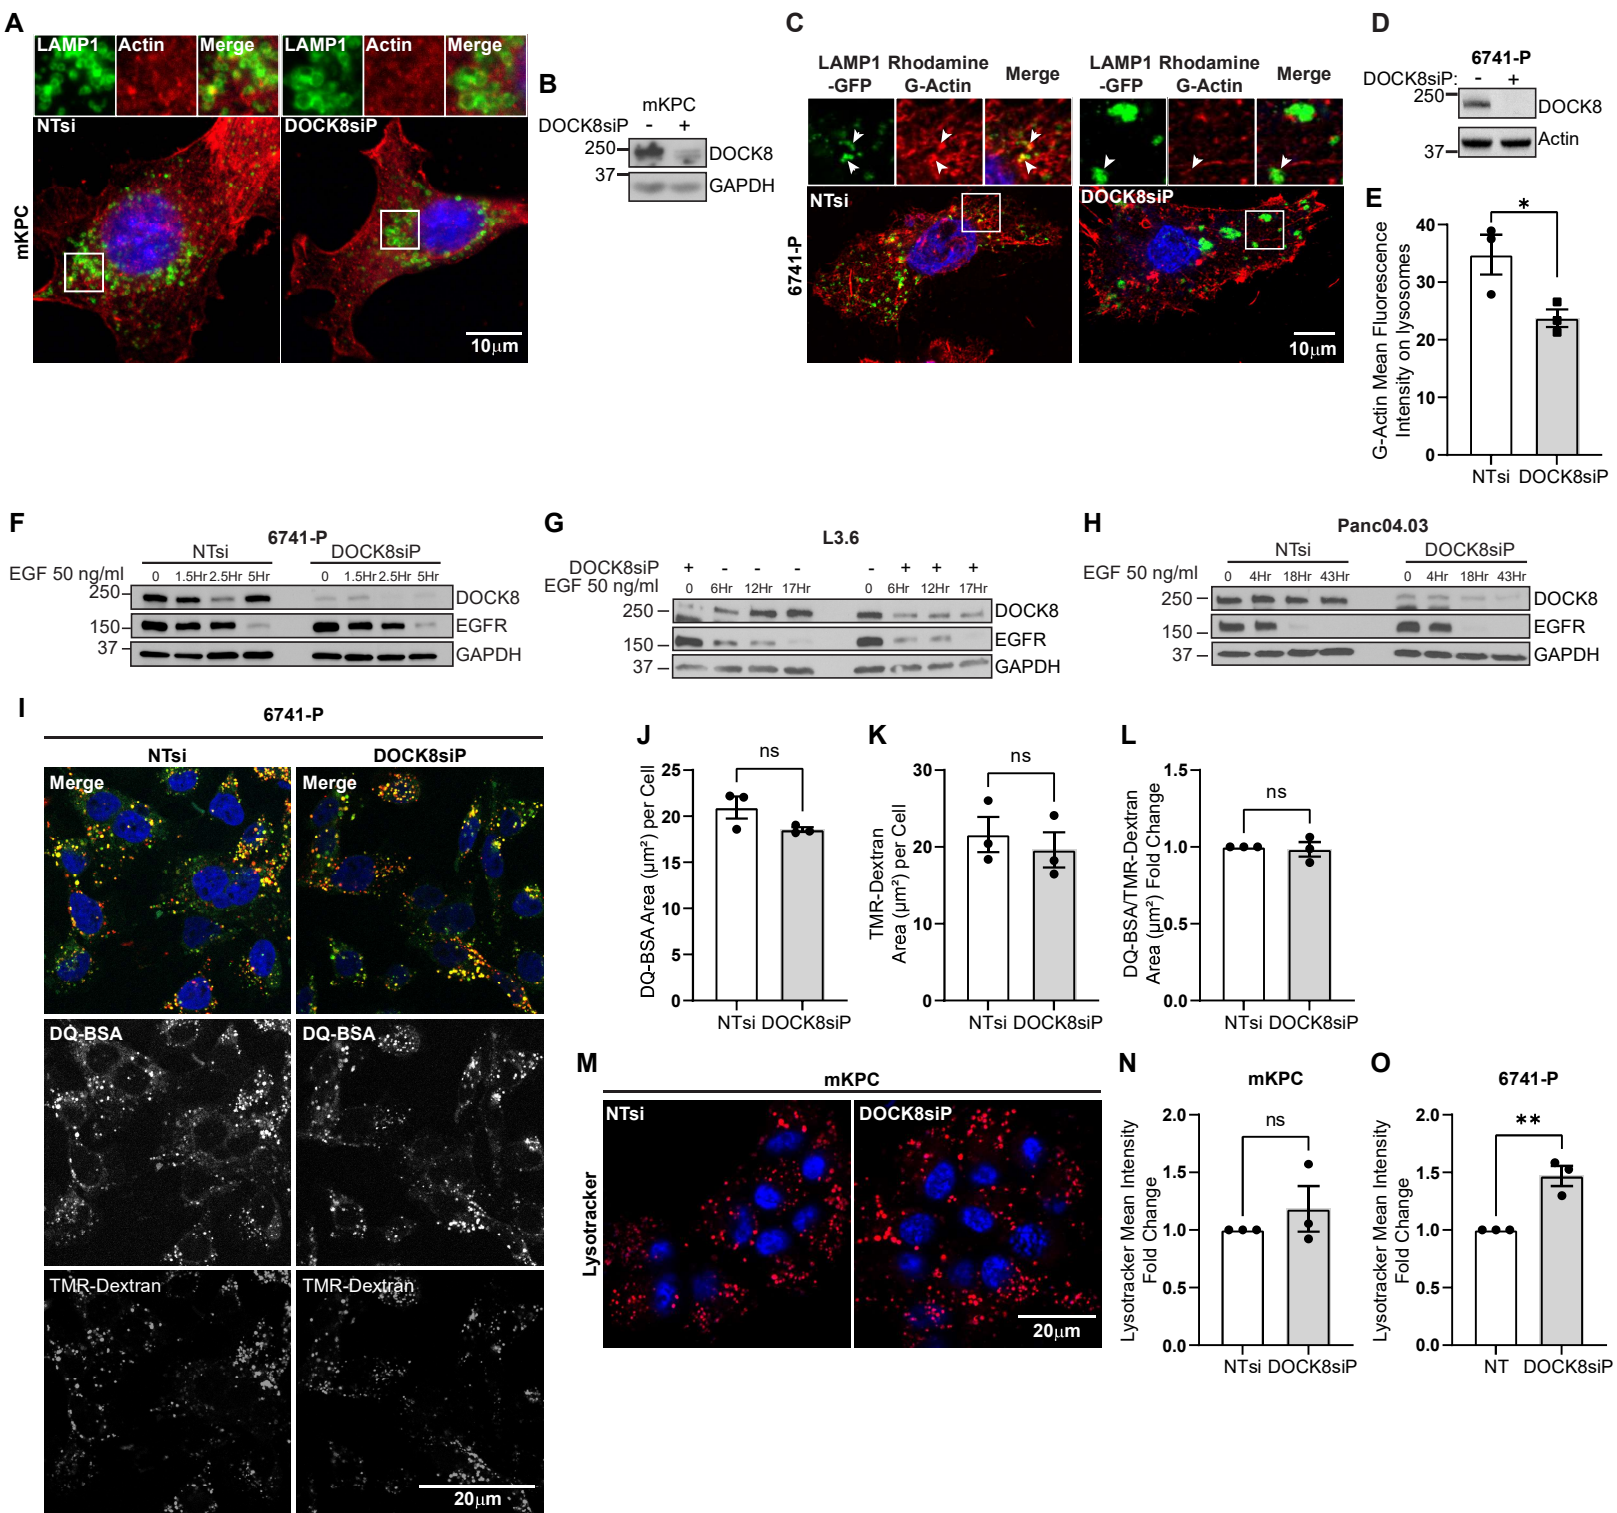

**Figure S6. DOCK8 depletion reduces lysosomal actin without altering global lysosome function**

**Related to Figure 4**

**A**, Immunofluorescence staining of LAMP1 (green) and actin (red) in mKPC cells following DOCK8 knockdown. Scale bar 10 $\mu$ m. Quantitation in Fig. 4C. **B**, Immunoblotting validating DOCK8 knockdown in mKPC cells. **C**, Images of Rhodamine G-actin (red) nucleation at LAMP1-GFP (green) labeled lysosomes in 6741-P NT control and DOCK8 knockdown (DOCK8siP) cells. Scale bar 10 $\mu$ m. **D**, Immunoblotting validating DOCK8 knockdown in 6741-P cells. GAPDH serves as a loading control. **E**, Quantitation of Rhodamine G-actin fluorescence intensity overlapping with lysosomes (LAMP1-GFP). Nontargeting control n=47 cells, DOCK8siP n=59 cells. **F-H** Immunoblotting of EGFR degradation assay in **F**, 6741-P, **G**, L3.6, and **H**, Panc04.03 cells following DOCK8 knockdown (DOCK8siP) and treatment with 50ng/ml EGF for the indicated times. GAPDH serves as loading control. **I**, Images of DQ-BSA (green) and TMR-Dextran (red) in 6741-P cells following DOCK8 knockdown (DOCK8siP). Quantitation of **J**, DQ-BSA degradation (green, area per cell). **K**, Quantitation of macropinocytosis of TMR-Dextran (red, area per cell). Nontargeting control, n=252 total cells; DOCK8 KD, n=211. **L**, DQ-BSA fluorescence normalized to Macropinocytosis of TMR-Dextran. **M**, Images of lysotracker labeled lysosomes in mKPC cells following DOCK8 knockdown. Quantitation of lysotracker mean fluorescence intensity in **N**, mKPC (nontargeting control n= 414 total cells; DOCK8 KD, n= 496), and **O**, 6741-P cells (Images in S5P). Scale bars, 20 $\mu$ m (**I**, **M**). Graphs show the mean  $\pm$  S.E.M of three independent biological replicates. P-values were calculated using a Student's t-test. ns, p > .05; \*, p  $\leq$  0.05; \*\*, p < 0.01; \*\*\*, p < 0.001; \*\*\*\*, p  $\leq$  0.0001.



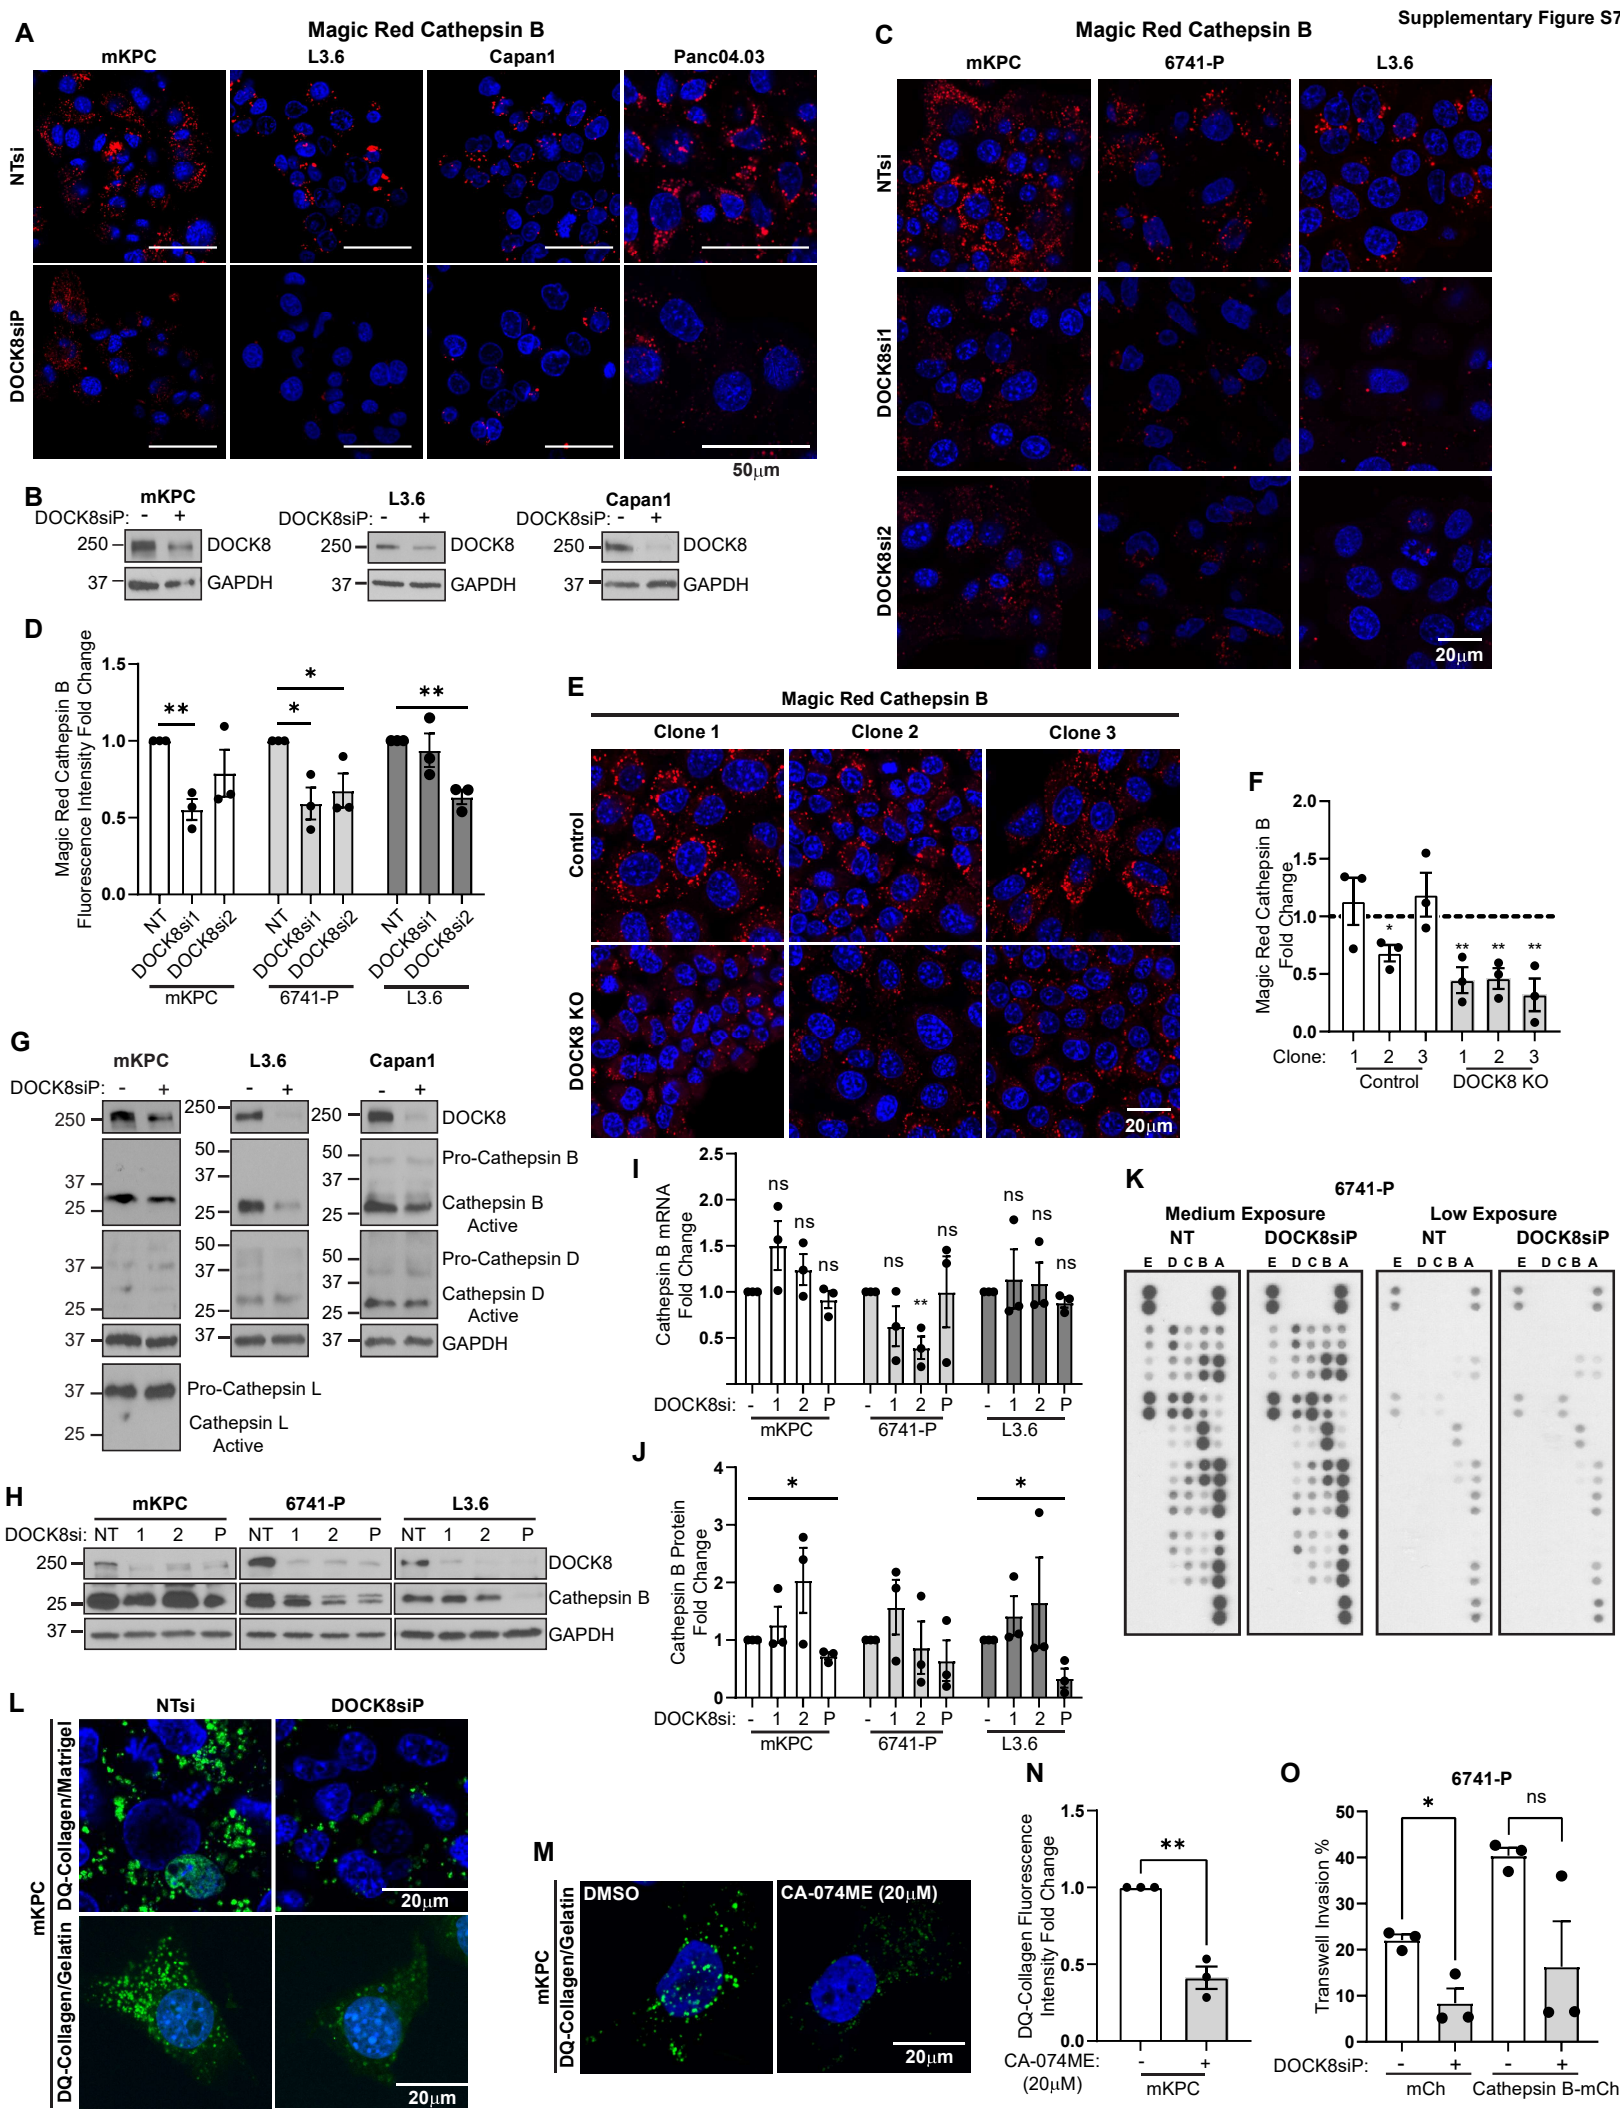

## Figure S7. DOCK8 promotes pancreatic cancer cell invasion via cathepsin B

### Related to Figure 4, 5

**A**, Images of Magic Red Cathepsin B fluorescence (red) indicating decreased active cathepsin B in mKPC, L3.6, Capan1, and Panc04.03 (immunoblot on figure 3A) cells following DOCK8 knockdown with a DOCK8siP. Scale bars, 50 $\mu$ m. **B**, Immunoblotting of DOCK8 in cells in **A** confirming DOCK8 knockdown. GAPDH serves as loading control. **C**, Images of Magic Red Cathepsin B fluorescence (red) indicating decreased active cathepsin B in mKPC, 6741-P, and L3.6 following DOCK8 knockdown with individual DOCK8si1, DOCK8si2, or nontargeting control. Scale bars, 20 $\mu$ m. **D**, Quantitation of Magic Red Cathepsin B fluorescence intensity in **C** (mKPC NT control n=411 cells, DOCK8si1 n=471 cells, DOCK8si2 n=441 cells; 6741-P NT control n=220 cells, DOCK8si1 n=247 cells, DOCK8si2 n=276 cells; L3.6 NT control n=263 cells, DOCK8si1 n=249 cells, DOCK8si2 n=272 cells). **E**, Images of Magic Red Cathepsin B fluorescence (red) in control and DOCK8 CRISPR knockout mKPC cells. Scale bars, 20 $\mu$ m. **F**, Quantitation of Magic Red Cathepsin B fluorescence intensity in **E** (Control clone 1 n= 404 cells; Control clone 2 n= 509 cells; Control clone 3 n= 292 cells; DOCK8 KO clone 1 n=630 cells; DOCK8 KO clone 2 n= 397 cells; DOCK8 KO clone 3 n= 683 cells). **G**, Immunoblotting of cathepsins in mKPC, (DOCK8, cathepsin B, D, L, and GAPDH), L3.6, and Capan1 cells (DOCK8, cathepsin B, D, and GAPDH) following DOCK8 knockdown. Quantified in figure 4**G**. **H**, Immunoblotting of cathepsin B in mKPC, 6741-P, and L3.6 cells following DOCK8 knockdown with (DOCK8si1, DOCK8si2, and DOCK8siP). **I**, Relative cathepsin B mRNA levels by qRT-PCR in DOCK8 knockdown cells from **H**. **J**, Quantitation of cathepsin B protein fold change normalized to GAPDH and nontargeting control in cells from **H**. **K**, Protease arrays for secreted proteases in conditioned media from DOCK8 knockdown (DOCK8siP) 6741-P cells. Quantitation in figure 5**A**. **L**, Images of cleaved DQ-Collagen (green) and nuclei (Hoechst, blue). mKPC Cells were seeded on coverslips coated with DQ-Collagen/Matrigel (top images) or DQ-Collagen/Gelatin mix (bottom images) following DOCK8 knockdown and were allowed to degrade ECM for two days. DOCK8 knockdown reduced ECM degradation. Quantified in figure 5**D**, **E**. Scale bars, 20 $\mu$ m. **M**, Cathepsin B is required for ECM degradation. Images of cleaved DQ-collagen (green) by mKPC cells seeded on a DQ-collagen substrate with gelatin for two days following overnight treatment with the cathepsin inhibitor CA-074ME (20 $\mu$ M) or DMSO as control. Scale bars, 20 $\mu$ m. **N**, Quantitation of cleaved DQ-Collagen in the indicated cells. Cells were allowed to degrade ECM in the presence of CA-074ME for two days (DMSO, n= 208 total cells; CA-074ME, n=314). **O**, Transwell cell invasion of 6741-P cells following mCherry or cathepsin B-mCherry expression and overnight treatment with CA-074ME (20 $\mu$ M) or DMSO control. Cells were seeded on Matrigel coated transwell filters in the presence of CA-074ME and allowed to invade for 20 hours towards a high serum gradient. A total of 1500 cells were counted per condition across three experiments. Graphs show the mean  $\pm$  S.E.M of three independent biological replicates. P-values were calculated using a Student's t-test. ns, p > .05; \*, p  $\leq$  0.05; \*\*, p < 0.01; \*\*\*, p < 0.001; \*\*\*\*, p  $\leq$  0.0001.
